1 **TITLE: Cardiolipin targets a dynamin related protein to the nuclear membrane**

2 Usha Pallabi Kar#, Himani Dey# and Abdur Rahaman\*

3 School of Biological Sciences

4 National Institute of Science Education and Research-HBNI, INDIA

5 # joint first authors

6 \* Corresponding author

7

8 **ABSTRACT:**

9 Dynamins are large cytoplasmic GTPases that are targeted to specific cellular membranes  
10 which they remodel via membrane fusion or fission. Although the mechanism of target  
11 membrane selection by dynamins has been studied, the molecular basis of conferring  
12 specificity to bind specific lipids on the target membranes is not known in any of the family  
13 members. Here, we report a mechanism of nuclear membrane recruitment of Drp6 that is  
14 involved in nuclear remodeling in *Tetrahymena thermophila*. Recruitment of Drp6 depends on  
15 a domain that binds to cardiolipin-rich bilayers. Consistent with this, the nuclear localization  
16 of wildtype Drp6 was inhibited by depleting cardiolipin in the cell. Cardiolipin binding was  
17 blocked with a single amino acid substitution (I553M) in the membrane-binding domain of  
18 Drp6. Importantly, the I553M substitution was sufficient to block nuclear localization without  
19 affecting other properties of Drp6. Consistent with this result, co-expression of wildtype Drp6  
20 was sufficient to rescue the localization defect of I553M variant in *Tetrahymena*. Inhibition of  
21 cardiolipin synthesis or perturbation in Drp6 recruitment to nuclear membrane caused defects  
22 in the formation of new macronuclei post-conjugation. Taken together, our results elucidate a  
23 molecular basis of target membrane selection by a nuclear dynamin, and establish the  
24 importance of a defined membrane-binding domain and its target lipid in facilitating nuclear  
25 expansion.

26

27 **INTRODUCTION:**

28 Topological changes and remodeling of membranes are fundamental processes in cellular  
29 physiology. Intricate biological machineries have evolved to facilitate these changes in living  
30 cells. Dynamins and dynamin related proteins (DRPs) comprise a family of large GTPases that  
31 catalyze membrane remodeling reactions (Praefcke and McMahon 2004). Members of the  
32 dynamin family are mechano-chemical enzymes which couple the free energy of GTP  
33 hydrolysis with membrane deformation, thereby performing important cellular functions  
34 ranging from scission of membrane vesicles, cytokinesis, and maintaining mitochondrial

35 dynamics to conferring innate antiviral immunity (Ramachandran and Schmid 2018). The  
36 common features shared by all dynamins and DRPs are the presence of a large GTPase domain  
37 (GD), a middle domain (MD) and a GTPase effector domain (GED), which distinguish them  
38 from other GTPases (Praefcke and McMahon 2004). The MD and the GED are involved in  
39 oligomerization and regulation of GTPase activity (Ramachandran, Surka et al. 2007). The  
40 feature that distinguishes DRPs from classical dynamins is the lack of a defined pleckstrin  
41 homology domain (PH domain) and a proline rich domain (PRD).

42 All dynamin proteins undergo rounds of assembly and dis-assembly on the target membrane,  
43 and tubulate the underlying membrane, which is required for fission or fusion function. The  
44 members of this family become associated with lipids on the target membrane and are important  
45 for performing cellular functions (Ramachandran and Schmid 2018). The PH domain in  
46 classical dynamins binds to phosphatidyl inositol 4,5 bis-phosphate (PIP<sub>2</sub>) at the target sites of  
47 endocytosis, and plays an essential role in vesicle scission during endocytosis (Zheng, Cahill et  
48 al. 1996). All the DRPs lack PH domains and instead possess either lipid binding loops or trans-  
49 membrane domains for membrane recruitment or association (Ramachandran and Schmid  
50 2018). A stretch of positively-charged amino acid residues in the lipid binding loops of all  
51 known DRPs interacts with the negatively-charged head groups of the lipids and this interaction  
52 is important for target membrane association (Rujiviphat, Meglei et al. 2009, von der Malsburg,  
53 Abutbul-Ionita et al. 2011, Bustillo-Zabalbeitia, Montessuit et al. 2014, Smaczynska-de,  
54 Marklew et al. 2019, Wang, Guo et al. 2019, Yan, Qi et al. 2020).

55 Nuclear remodeling including its expansion is a fundamental process in eukaryotes, the  
56 mechanism of which is not well understood in any organism. It requires remodeling of nuclear  
57 membrane and incorporation of new materials including lipids and proteins into the existing  
58 membrane. *Tetrahymena thermophila*, a unicellular ciliate, exhibits nuclear dimorphism. Each  
59 cell harbors a small, diploid, transcriptionally inactive micronucleus (MIC) and a large,  
60 polyploid, transcriptionally-active macronucleus (MAC) (Karrer 2000). During sexual  
61 conjugation in *Tetrahymena*, two cells of complementary mating types first form a pair,  
62 followed by a series of complex nuclear events resulting in the loss of the parental MAC.  
63 Subsequently, new MIC and MAC are formed through the fusion of haploid nuclei produced  
64 from parental micronuclei. The precursors of the new MIC and MAC are identical in size and  
65 in genome content at the initial stage of nuclear differentiation. However, two of the four new  
66 MICs rapidly enlarge, making the final volume 10-15 fold larger, and develop into MACs  
67 (Cole, Cassidy-Hanley et al. 1997). This process calls for a sudden and dramatic expansion of  
68 nuclear envelope. DRP6, which is one of the eight dynamin-related protein paralogs in

69 *Tetrahymena*, is specifically upregulated when the MICs rapidly expand to form new MACs.  
70 Inhibition of Drp6 function results in a profound deficiency in the formation of new MACs  
71 (Rahaman, Elde et al. 2008). It has been recently demonstrated that Drp6 functions as an active  
72 GTPase and self-assembles into higher order helical spirals and ring structures, and therefore  
73 resembles other members of the family (Kar, Dey et al. 2018).

74 In the present study, we have elucidated a mechanism for DRP6 recruitment in the  
75 nuclear membrane. Our results reveal that Drp6 directly interacts with membrane lipids, and  
76 that cardiolipin acts as its physiologically-important target lipid. Further, we have identified a  
77 lipid-binding domain in Drp6, and provide evidence that the domain plays a pivotal role in  
78 nuclear association of Drp6 and therefore in nuclear expansion.

79

## 80 **RESULTS:**

### 81 **A DRP targeting domain (DTD) is important for nuclear recruitment of Drp6**

82 All the known dynamin family proteins perform cellular functions by associating with target  
83 membrane. Classical dynamins contain a pleckstrin homology (PH) domain responsible for  
84 membrane binding (Fig. 1a). Drp6 associates with nuclear envelope and regulates nuclear  
85 remodeling in *Tetrahymena*. However, Drp6 like other DRPs lacks a PH domain or any  
86 recognizable membrane binding domain (Fig. 1a). Sequence alignment revealed the presence  
87 of a region in Drp6 that is located at the position of the PH domain of classical dynamin (Fig.  
88 1b, S1A) and that was earlier named the Drp targeting determinant (DTD) (Elde, Morgan et al.  
89 2005).

90 To assess if the DTD is important for recruitment of Drp6 to target membranes, full  
91 length *DRP6* and *drp6 $\Delta$ DTD* were expressed separately as N-terminal GFP fusion proteins and  
92 their cellular distributions were compared by confocal microscopy. As expected, Drp6 was  
93 chiefly present on the nuclear envelope and also on some cytoplasmic puncta (Fig. 1c and S1B).  
94 These cytoplasmic puncta of Drp6 are ER-derived vesicles (Rahaman, Elde et al. 2008). When  
95 confocal images of *GFP-drp6 $\Delta$ DTD* expressing cells were analyzed, it was observed that the  
96 deletion of DTD resulted in complete loss of nuclear localization, and it was mainly associated  
97 with cytoplasmic puncta (Fig. 1c and S1B). These results clearly demonstrate that DTD is  
98 necessary for recruiting Drp6 to the nuclear envelope but not to cytoplasmic puncta. We next  
99 evaluated if the DTD is sufficient for nuclear envelope targeting, by expressing it as a GFP-  
100 fusion. The confocal images of cells expressing *GFP-drp6-DTD* showed that GFP-DTD often  
101 appeared as cytoplasmic puncta, but that nuclear envelope localization in a subset of cells is

102 detectable albeit less prominently as compared to that of GFP-Drp6 (Fig. 1c and S1B). This  
103 suggests that the DTD is able to interact with the nuclear envelope. This interaction appears  
104 weaker than for the full-length protein, suggesting that other domains also contribute to nuclear  
105 recruitment of Drp6. Similarly, other dynamin family members rely for their targeting on a  
106 membrane-binding domain but also other domains such as GTPase domain (Vallis, Wigge et  
107 al. 1999, von der Malsburg, Abutbul-Ionita et al. 2011, Bramkamp 2012). We conclude that  
108 DTD is essential but not sufficient for Drp6 recruitment to the nuclear envelope. In contrast,  
109 Drp6 does not require its DTD for targeting to the ER-derived cytoplasmic vesicles

110

### 111 **DTD is the membrane-binding domain of Drp6**

112 Recruitment of a protein to a target membrane is achieved either by interaction with membrane  
113 lipids or by forming a complex with another membrane protein. The DTD is essential for  
114 recruitment of Drp6 to the nuclear envelope, and may represent a membrane-binding domain.  
115 To test this idea, we generated N-terminal histidine tagged- *drp6-DTD* and *DRP6* for bacterial  
116 expression and purification, and then used the purified proteins in lipid overlay assays. Drp6  
117 was purified to near homogeneity (Fig. 2a) and incubated with total *Tetrahymena* lipid spotted  
118 on nitrocellulose membrane either in the presence or absence of GTP. Drp6 interacts with  
119 *Tetrahymena* lipid with or without GTP (Fig. 2b) suggesting that it harbors a lipid-binding  
120 domain. To identify the lipids with which Drp6 interacts, we performed the overlay assay using  
121 commercially available strips spotted with fifteen different lipids (Echelon Biosciences, USA).  
122 The results demonstrated that Drp6 specifically interacts with three phospholipids, namely  
123 phosphatidylserine (PS), phosphatidic acid (PA) and cardiolipin (CL) (Fig. 2b). In order to find  
124 out whether lipid binding is a property of the DTD, we partially purified DTD as an N-terminal  
125 his tagged protein (Fig. 2a) and used it for the overlay assay. Like the full-length protein, DTD  
126 also interacts with all three phospholipids (Fig. 2b).

127 We then looked at lipid binding in the physiologically-relevant context of a bilayer,  
128 using an *in vitro* binding assay to liposomes containing 10% PA, 10% PS, or 10% CL. All the  
129 liposomes also contained 70% PC and 20% PE. In sucrose density flotation gradients, the  
130 recombinant Drp6 co-migrated with all the three types of liposomes, appearing in the top (light)  
131 fractions (Fig. 2c). Drp6 was not found in the gradient top fractions in the absence of added  
132 liposomes (Fig. 2c). Similarly, Drp6 also failed to co-migrate with liposomes that contained  
133 only PC and PE (Fig. 2c). Taken together, our results indicate that Drp6 interacts with  
134 membranes *in vitro*, and that this depends on the presence of either PS, PA or CL. DTD by itself  
135 interacts with the same three phospholipids as holo-Drp6, consistent with the idea that DTD is

136 the membrane-binding domain. To further test this idea, we performed sub-cellular  
137 fractionation of cells expressing *GFP-drp6-DTD* or *GFP-drp6*. As shown in Fig. 2d, Drp6  
138 appeared in both soluble and membrane fractions. DTD also appeared in the membrane fraction,  
139 suggesting that it can bind to membranes *in vivo* (Fig. 2d). Taken together, these results lead us  
140 to conclude that DTD is a membrane-binding domain and requires phosphatidylserine,  
141 phosphatidic acid or cardiolipin for association with the membrane.

142

### 143 **A single point mutation (I553M) in the membrane-binding domain abrogates nuclear** 144 **recruitment of Drp6:**

145 Dynamin binds to membrane lipids via interaction between its PH domain and the PIP2 head  
146 group. A hydrophobic patch in the PH domain of classical dynamin is important for membrane  
147 association/insertion (Ramachandran, Pucadyil et al. 2009). The sequence similarity between  
148 PH domain of human dynamin 1 and corresponding region of Drp6 is very low (Fig. 1b).  
149 However, the structural similarity is very high among all the dynamin family proteins whose  
150 structures are known. Therefore, we generated a three-dimensional model of Drp6 in order to  
151 identify the corresponding hydrophobic region in the DTD. The 3-D modelling of Drp6 shows  
152 that the structure of DTD is not related to PH domain, but that nonetheless has a hydrophobic  
153 patch (aa 553 - 555) (Fig. 3a). To test the importance of this patch, we substituted the first  
154 residue, I553, with M. We expressed this mutant allele as an N-terminal GFP-fusion (GFP-  
155 Drp6-I553M), and in parallel expressed a GFP-fusion of the wildtype protein (GFP-Drp6), and  
156 characterized their localization in *Tetrahymena* by confocal microscopy. While the latter  
157 localized mainly on the nuclear envelope with few cytoplasmic puncta, the mutated GFP-Drp6-  
158 I553M was not visible on the nuclear envelope but was instead exclusively present at  
159 cytoplasmic puncta (Fig. 3b). This difference suggests that the isoleucine at 553<sup>rd</sup> position is  
160 important for nuclear localization of Drp6.

161

### 162 **Mutation at I553 does not affect GTPase activity and self-assembly of Drp6**

163 Dynamin and dynamin-related proteins require binding and hydrolysis of GTP for target  
164 membrane localization and membrane remodeling functions. Drp6 hydrolyses GTP *in vitro*  
165 (Kar, Dey et al. 2018). To understand if the mutation at I553 affects GTP binding and/or  
166 hydrolysis, we expressed and purified Drp6-I553M and Drp6 as N-terminal histidine tagged  
167 proteins (Fig. 4a) and compared their GTPase activities. The GTPase activity of Drp6-I553M  
168 ( $0.061 \pm 0.002$  nmol/ $\mu$ M/min) was not significantly different from that of Drp6 ( $0.056 \pm 0.003$

169 nmol/ $\mu$ M/min) (Fig. 4b). The GTPase activities of both wildtype and mutant proteins were also  
170 found to be similar when reactions were carried out for 0 to 20 min (Fig. 4b). We also assessed  
171 the Michaelis-Menten constant ( $K_m$ ) and maximum velocity ( $V_{max}$ ) for both these proteins (Fig.  
172 4c). The  $K_m$  of Drp6-I553M (384  $\mu$ M) was found to be slightly higher than that of Drp6 (180  
173  $\mu$ M) suggesting a marginal decrease in GTP binding affinity. The mutation did not affect  $V_{max}$   
174 (0.089 nmol/ $\mu$ M/min for Drp6; 0.0893 nmol/ $\mu$ M/min for Drp6-I553M). Taken together, these  
175 results suggest that the defect in nuclear localization of Drp6-I553M is not due to defective  
176 GTPase activity.

177 Another property of dynamin related proteins is their ability to assemble and dis-  
178 assemble at their target membranes. This involves self-assembly of helical spirals and ring  
179 structures, and is important for membrane association and membrane remodeling functions.  
180 The self-assembly of Drp6 and Drp6-I553M was evaluated by size exclusion chromatography.  
181 Drp6 eluted in the void volume as an oligomer containing at least 6 monomers, as previously  
182 observed (Kar, Dey et al. 2018) (Fig. 4d) . Similarly, Drp6-I553M also formed higher order  
183 structures, as the majority of the protein eluted in the void volume (Fig. 4d). A small peak of  
184 material eluting near the 150 kDa marker might correspond to a dimer. The breadth of this  
185 smaller peak suggests it consists of a mixture of monomeric and oligomeric structures, with a  
186 dimer at the peak fraction. Since the mutant protein was able to form higher order oligomeric  
187 structure, we suggest that mutation does not inhibit its self-assembly. However, there might be  
188 a difference in the assembly products formed by the wildtype and mutant proteins. To examine  
189 this possibility, we compared the ultrastructure of the wildtype and mutant proteins by electron  
190 microscopy of negatively stained preparations of the purified recombinant proteins. The Drp6  
191 appeared mostly as large helical spirals which are similar to structures found in other DRPs  
192 (Fig. 4e and Fig. S2). Ring-like structures were also present, as also found in other members of  
193 the family. Similarly, in Drp6-I553M samples we observed both helical spirals and ring-like  
194 structures (Fig. 4e, S2). These results suggest that the I553M mutation does not block *in vitro*  
195 oligomerization of Drp6. Taken together, our results suggest that defective nuclear localization  
196 of Drp6-I553M is not due to defects in GTPase activity or perturbation of self-assembly.

197

### 198 **Cardiolipin is important for nuclear recruitment of Drp6**

199 Dynamin family proteins including Drp6 associate with their target membranes by interacting  
200 with specific lipids. To ask whether the I553M mutation might affect these interactions, we  
201 used *in vitro* membrane binding assays. Recombinant Drp6 and Drp6-I553M proteins were

202 incubated separately with liposomes containing either 10% CL, PS, or PA. The association of  
203 the proteins with liposomes was then judged based on their co-floitation in sucrose density  
204 gradients. As can be seen in Fig. 5a, Drp6 co-floated with all the three liposomes and appeared  
205 on the top fractions, whereas Drp6-I553M co-floated with PS- or PA-containing liposomes but  
206 failed to co-float with CL-containing liposomes. Since the mutant retains the ability to associate  
207 with PS- and PA-containing liposomes, the overall membrane binding activity of Drp6 does not  
208 depend on I553. Instead, the mutation of I553 specifically inhibits interaction with CL. Based  
209 on these results, we infer that cardiolipin interacts with I553 in the membrane-binding domain,  
210 and that this interaction is important for membrane targeting in vitro.

211 We then asked whether the interaction between Drp6 and cardiolipin was important for  
212 nuclear targeting in vivo. Importantly, while the nuclear envelope of animals (Keenan,  
213 Berezney et al. 1970, Kleinig, Zentgraf et al. 1971, Sato, Fuji et al. 1972, Jarasch, Reilly et al.  
214 1973) lacks cardiolipin, cardiolipin is present in the nuclear membrane of *Tetrahymena*  
215 (Nozawa, Fukushima et al 1973). To evaluate if cardiolipin is required for nuclear localization  
216 of Drp6, we depleted cardiolipin from *GFP-drp6* expressing cells using pentachlorophenol  
217 (PCP), a polychlorinated aromatic compound. PCP is a respiratory uncoupler and a potent  
218 inhibitor of cardiolipin synthesis (Ono and White 1971). Within 30 minutes of PCP treatment,  
219 GFP-Drp6 dissociated from nuclear envelopes in the majority of cells while remaining  
220 associated with cytoplasmic puncta (Fig. 5b, S3). Quantitative analysis showed that while GFP-  
221 Drp6 was localized at the nuclear envelope of all untreated cells, more than 80% of the cells  
222 completely lost nuclear localization of GFP-Drp6 with the remaining cells showing decreased  
223 nuclear localization upon PCP treatment. To check that the nuclear envelope itself remains  
224 intact under these conditions, we localized the nuclear pore protein GFP-Nup3. We found that  
225 GFP-Nup3 was clearly associated with nuclear envelopes before or after PCP treatment (Fig.  
226 5b, S3). Moreover, PCP treatment does not disrupt membrane structure in general since the  
227 distribution of a cortical membrane-binding protein GFP-Nem1D (Shukla, Pillai et al. 2018)  
228 was also not affected by this treatment (Fig. 5b, S3). These results therefore suggest that the  
229 delocalization of GFP-Drp6 upon PCP treatment is due to loss of cardiolipin.

230 If the defect in localization of Drp6-I553M is due to a defect in CL-dependent targeting,  
231 one might expect that the defect would be suppressed in the presence of the wildtype protein,  
232 since the mutant protein would co-assemble with the correctly-targeted wildtype. To test this  
233 idea, we co-expressed *GFP-drp6-I553M* and *mCHERRY-drp6*. mCHERRY-Drp6 colocalized  
234 almost entirely with GFP-Drp6-I553M and was targeted to nuclear envelopes as well as

235 cytoplasmic puncta, strongly suggesting that the mutant protein is able to co-assemble with the  
236 wildtype protein (Fig. 5c). This result also reinforces the earlier conclusion that the mutation  
237 does not affect the overall structure of the protein.

238

### 239 **Interaction of cardiolipin with Drp6 via membrane-binding domain is required for** 240 **nuclear expansion**

241 Previously, it has been shown that Drp6 is essential for MAC development in *Tetrahymena*  
242 (Rahaman, Elde et al. 2008). We have now established that interaction of Drp6 with cardiolipin  
243 is important for nuclear recruitment. Therefore, we hypothesized that inhibition of cardiolipin-  
244 Drp6 interaction would inhibit Drp6 function in MAC development. We took two independent  
245 approaches to perturb the interaction between cardiolipin and Drp6, and assessed the effect on  
246 MAC development. In the first approach, cardiolipin was depleted by treating cells at a stage  
247 prior to MAC development with PCP, and then measuring the efficiency of new MAC formation  
248 in conjugating cells (Fig. 6a). Quantitative analysis showed that while  $71 \pm 3.6\%$  of the  
249 conjugants developed MACs in the control pairs, only  $24 \pm 1.7\%$  developed MACs in the PCP-  
250 treated pairs (Fig. 6a). In the second approach, we perturbed cardiolipin-Drp6 interaction by  
251 treating conjugants with nonyl acridine orange (NAO). NAO interacts with cardiolipin with  
252 very high affinity and has been used in mammalian cells to block interactions between  
253 cardiolipin and mitochondrial proteins involved in electron transport (Maftah, Petit et al. 1990).  
254 Exposing conjugants to NAO significantly inhibited new MAC development (Fig. 6a).

255 In conjugating *Tetrahymena*, MAC development is not the only phenomenon requiring  
256 nuclear expansion. At a prior stage, the germline micronuclei (MICs) show dramatic elongation  
257 (Cole, Cassidy-Hanley et al. 1997). We found that PCP treatment did not affect the frequency  
258 of elongation, i.e., the percentage of pairs showing elongated MICs, but did produce a decrease  
259 in the extent of MIC elongation (6A). This inhibition of elongation had no detectible  
260 consequences for the subsequent stage of MIC meiosis (Fig. 6a). Treatment with NAO had no  
261 measurable effect on MIC elongation or the subsequent meiosis (Fig.6A). These results are  
262 consistent with the idea that the key requirement for cardiolipin is during MAC expansion.

263 We next reasoned that if interaction of Drp6 with cardiolipin is important for MAC  
264 expansion, then over-expression of the isolated Drp6 membrane-binding domain might  
265 competitively inhibit the interaction and block Drp6 function during MAC expansion. To test  
266 this possibility, we expressed *GFP-drp6-DTD* in *Tetrahymena* and then allowed the cells to  
267 conjugate with a Drp6 wildtype strain. We measured MAC development in these pairs, and in



268 pairs from a parallel WT x WT cross, at 8 h during conjugation. In the control cross, more than  
269 75% of pairs developed new MACs. In striking contrast, only 4-5% of pairs developed normal  
270 MACs in the pairs that included *GFP-drp6-DTD*-expressing cells (Fig. 6b). Therefore, MAC  
271 development was almost completely blocked when *GFP-drp6-DTD*-expressing cells comprised  
272 one of the conjugation partners (Fig. 6b).

273 In similar experiments, we also asked whether the expression of *GFP-drp6 $\Delta$ DTD* might  
274 have a dominant-negative inhibitory effect on Drp6 function. Indeed, we found that in pairs  
275 where one cell over-expressed the  $\Delta$ DTD construct, the pairs showed inhibition of MAC  
276 development that was similar to that induced by expression of the isolated DTD domain (Fig.  
277 6b). Neither the expression of *GFP-drp6-DTD* nor *GFP-drp6 $\Delta$ DTD* significantly reduced the  
278 fraction of pairs showing elongated MICs (Fig. 6b).

279 In conclusion, prior experiments with *DRP6* gene knockout pointed to a specific  
280 function in MAC development. Our current results from over-expression of mutant alleles are  
281 consistent with this idea. Taken together, our results support a model in which interaction of  
282 Drp6 with cardiolipin, for which a single amino acid acts as a key determinant, is critical for  
283 nuclear targeting and therefore for MAC expansion.

284

## 285 **DISCUSSION:**

286 Drp6 is a nuclear dynamin and is involved in nuclear remodeling (Rahaman, Elde et al. 2008).  
287 In the present study, we have identified a membrane-binding domain in Drp6 that directly  
288 interacts with lipids. Inhibition of cardiolipin synthesis blocks nuclear localization of Drp6,  
289 suggesting that it plays a critical role in Drp6 recruitment. Further evidence of cardiolipin  
290 interaction determining nuclear localization of Drp6 comes from the mutation of isoleucine at  
291 the 553<sup>rd</sup> position. The mutant Drp6 protein loses its nuclear localization with concomitant loss  
292 of its interaction with cardiolipin without affecting other properties such as GTPase activity and  
293 self-assembly into rings/ helical spirals. The GFP-Drp6-I553M recruited to the nuclear  
294 envelope only when co-expressed with wildtype mCHERRY-Drp6, indicating that the mutant  
295 protein co-assembles with the wildtype (Fig. 3b). These results suggest that Drp6 molecules  
296 self-assemble on the nuclear envelope, and localizing the oligomer to the envelope does not  
297 require all subunits interact with cardiolipin. Taken together, these results suggest that the  
298 interaction between cardiolipin and the membrane-binding domain of Drp6 mediates the  
299 recruitment of Drp6 to the nuclear membrane.

300 We investigated the significance of cardiolipin in the nuclear remodeling function of  
301 Drp6. Inhibition of cardiolipin synthesis as well as perturbation of its interaction with Drp6

302 phenocopy the loss-of-function phenotype of Drp6, suggesting a role for cardiolipin in Drp6-  
303 mediated nuclear remodeling. Overexpression of Drp6-DTD or Drp6 $\Delta$ DTD inhibits MAC  
304 expansion. Since DTD interacts with lipid including cardiolipin, the inhibition of MAC  
305 expansion is expected to be by competing with Drp6-cardiolipin interaction, concomitantly  
306 inhibiting Drp6 recruitment to the nuclear envelope. Inhibition of nuclear expansion by  $\Delta$ DTD  
307 can be due to the inhibition of Drp6 localization on the nuclear envelope by forming a  
308 heterogenic complex as it lacks membrane-binding domain and does not associate with nuclear  
309 envelope. Based on these results, it can be concluded that cardiolipin acts as a molecular  
310 determinant in recruiting Drp6 on the nuclear envelope to perform nuclear remodeling function.

311 Drp6 is involved in nuclear expansion, which requires the incorporation of new lipids  
312 into the existing nuclear membrane, suggesting a membrane fusion function for Drp6.  
313 Consistent with this we recently observed that Drp6 is able to perform membrane fusion in vitro  
314 (our unpublished results). Membrane fission or fusion involves exchange of lipids between two  
315 juxtaposed bilayers, and optimum membrane fluidity is likely to be essential for the exchange  
316 of lipids between adjacent leaflets. Cardiolipin is known to facilitate the formation of apposed  
317 bilayers as well as to enhance membrane fluidity (Unsay, Cosentino et al. 2013). Dynamin  
318 proteins remodel membrane and bring bilayers to the vicinity during fission or fusion of  
319 membranes (Praefcke and McMahon 2004). Therefore, interaction of Drp6 with cardiolipin  
320 may enhance bilayer interaction and membrane fluidity. Taking together, it is reasonable to  
321 conclude that Drp6-cardiolipin interaction on the nuclear envelope facilitates nuclear expansion  
322 by enhancing membrane fusion and hence is essential for macronuclear expansion.

323 Drp6 interacts with three different lipids namely cardiolipin, phosphatidic acid and  
324 phosphatidylserine (present study). These interactions with multiple lipid might explain the  
325 localization of Drp6 in multiple sites (Fig. S4). The target specificity is often determined by the  
326 interaction of the membrane-binding domain with the specific lipids on the membrane.  
327 Although DRPs including Drp6 lack PH domain, they harbor a membrane-binding domain at  
328 the corresponding location (Fig. 1 and 2)(Ramachandran and Schmid 2018). The sequence  
329 diversity in this domain might explain the diverse functions of the family members on different  
330 target membranes. While PIP2 present in the plasma membrane associates with endocytic  
331 dynamin at the neck of vesicles, cardiolipin exclusively present in the mitochondria is  
332 recognized by the dynamins possessing mitochondrial remodeling function (Francy, Clinton et  
333 al. 2017, Kameoka, Adachi et al. 2018). Another lipid phosphatidylserine is abundantly present  
334 in mitochondria and is also recognized by mitochondrial dynamins (Yan, Qi et al. 2020). It is

335 important to note that the nuclear envelope of *Tetrahymena* contains 3% cardiolipin (Nozawa,  
336 Fukushima et al 1973) and Drp6 (which is specifically present in the ciliate *Tetrahymena*) has  
337 evolved to interact with cardiolipin for specific recruitment to the nuclear envelope. In addition  
338 to nuclear envelope, Drp6 is also associated with ER vesicles (Rahaman, Elde et al. 2008).  
339 Localization of Drp6-I553M mutant on ER vesicles and its ability to interact with PS and PA  
340 on the membrane suggest that Drp6 localization on ER is dependent either on PA or PS or  
341 combination of both. Considering the abundance of PA on the ER membrane (Pillai, Shukla et  
342 al. 2017, Zegarlinka, Piascik et al. 2018) it could be argued that PA is involved in recruitment  
343 of Drp6 to ER. We also observed localization of Drp6 on plasma membrane (Fig. S4) and since  
344 PS is also present in the plasma membrane (Kay, Koivusalo et al. 2012), it is possible that Drp6  
345 associates with plasma membrane via its interaction with PS. Although further experiments are  
346 required to find out the role of PS and PA in the recruitment of Drp6 in plasma membrane and  
347 ER, our results clearly show that lipid molecules play critical role in compartmentalizing the  
348 localization of Drp6 where CL shifts the dynamics from ER vesicles to nuclear envelope.

349 As mentioned earlier, I553 in the Drp6 membrane domain is critical for conferring  
350 specificity to Drp6 for recognizing cardiolipin on the nuclear envelope. The interaction of  
351 cardiolipin with I553 suggests the importance of hydrophobic patches for the target membrane  
352 specificity, since cardiolipin is known to interact strongly with hydrophobic residues (Planas-  
353 Iglesias, Dwarakanath et al. 2015). This is substantiated in the endocytic dynamin that uses a  
354 hydrophobic region including isoleucine at the 533<sup>rd</sup> position in the PH domain for insertion  
355 into the target membrane (Ramachandran, Pucadyil et al. 2009). Our results on isoleucine  
356 mutation within the membrane domain also suggest the presence of a similar hydrophobic patch  
357 in Drp6 that is important for membrane interaction specifically via cardiolipin present on the  
358 nuclear envelope. However, hydrophobicity is not the sole determinant for the specific  
359 interaction with cardiolipin since methionine, which is also a strong hydrophobic residue, does  
360 not interact with cardiolipin when substituted for isoleucine (Fig. 3b). Therefore, it is  
361 conceivable that, in addition to hydrophobicity, the local conformation particularly the side  
362 chain of isoleucine plays a critical role in conferring the specificity for the recruitment to the  
363 target membrane via interaction with cardiolipin. Although residues important for target  
364 membrane selection have been identified in many dynamin proteins, they involve a stretch of  
365 positively charged amino acid for recognizing anionic head groups of several lipids including  
366 cardiolipin, phosphatidylserine and PIP2 (Salim, Bottomley et al. 1996, Achiriloaie, Barylko et  
367 al. 1999, Vallis, Wigge et al. 1999, Rujiviphat, Meglei et al. 2009, von der Malsburg, Abutbul-  
368 Ionita et al. 2011, Bustillo-Zabalbeitia, Montessuit et al. 2014, Smaczynska-de Rooij, Marklew

369 et al. 2015, Wang, Guo et al. 2019). However, it is not known how different dynamin proteins  
370 distinguish different lipids solely based on ionic interaction. In the present study we  
371 demonstrate that a single isoleucine in the membrane-binding domain of Drp6 provides the  
372 specificity for cardiolipin. This isoleucine residue, however, does not influence Drp6  
373 interaction with phosphatidylserine or phosphatidic acid, hence distinguishes among different  
374 negatively charged lipids. This is the first example of any dynamin protein in which a single  
375 amino acid site is shown to be important for conferring specificity to a lipid (cardiolipin), and  
376 thereby providing an additional target membrane (nuclear membrane) binding property to the  
377 protein. Perhaps this is also the first example in this family of proteins where a non-ionic  
378 interaction is shown to determine association with a specific target membrane. Although further  
379 experiments are needed to show the role of other two hydrophobic amino acid residues (M554  
380 and I555) in the hydrophobic patch (aa 553-555 of Drp6) for the nuclear recruitment, our results  
381 provide the underlying mechanism of target membrane selection by a nuclear dynamin, and  
382 underscore the importance of cardiolipin interaction with a single amino acid residue in the  
383 Drp6 membrane binding domain in facilitating nuclear expansion.

384

## 385 **MATERIALS AND METHODS:**

### 386 ***Tetrahymena* strains and culture conditions:**

387 *Tetrahymena thermophila* CU428 and B2086 strains were obtained from *Tetrahymena* stock  
388 center, (Cornell university). Cells were cultured in SPP medium (2% proteose peptone (BD,  
389 USA), 0.2% glucose, 0.1% yeast extract and 0.003% ferric EDTA) at 30°C under shaking at  
390 90rpm. For conjugation, mating type cells were grown in SPP media to a density of  $3 \times 10^5$   
391 cells/ml, washed and resuspended in DMC media (0.17 mM sodium citrate, 0.1 mM NaH<sub>2</sub>PO<sub>4</sub>,  
392 0.1 mM Na<sub>2</sub>HPO<sub>4</sub>, 0.65 mM CaCl<sub>2</sub>, 0.1 mM MgCl<sub>2</sub>) and incubated at 30°C, 90rpm for 16-18  
393 hours. To initiate conjugation, starved cells of two different mating types were mixed and  
394 incubated at 30°C without shaking. All the reagents were purchased from Sigma Aldrich unless  
395 mentioned otherwise.

396

### 397 **Cloning and expression of transgenes in *Tetrahymena*:**

398 The Drp6 $\Delta$ DTD lacking aa 517-600 was created by overlap PCR using a set of four  
399 oligonucleotides in a two-step PCR method. Drp6-I553M (mutation of isoleucine to methionine  
400 at 553<sup>rd</sup> residue of Drp6) was generated by site-directed mutagenesis using Quick Change  
401 protocol (Stratagene). For expression in *Tetrahymena*, rDNA based vector pVGF or pIGF was

402 used. While the PCR products of Drp6 (aa 1-710), Drp6 $\Delta$ GED (aa 1-600) and Drp6-DTD (aa  
403 517-600) were inserted between XhoI and ApaI restriction sites of pVGF, the Drp6-I553M and  
404 Drp6 $\Delta$ DTD were introduced into pIGF using Gateway cloning strategy (Invitrogen) using the  
405 manufacturer's protocol, and were expressed as N-Ter GFP tagged fusion proteins. All the  
406 constructs were confirmed by sequencing. Conjugating wildtype *Tetrahymena* cells were  
407 transformed with these constructs by electroporation, and the transformants were selected using  
408 100 $\mu$ g/ml paromomycin sulphate. For the co-expression studies, *mCHERRY-Drp6* was  
409 generated by introducing mCHERRY sequences between PmeI and XhoI sites followed by  
410 Drp6 sequences between XhoI and ApaI sites of NCVB vector. Co-transformants were  
411 generated by biolistic transformation of linearized mCHERRY-Drp6 nucleotide sequences into  
412 the cells expressing *GFP-drp6-I553M*, and were selected in presence of 60  $\mu$ g/ml blasticidine  
413 and 120  $\mu$ g/ml paromomycin sulfate supplemented with 1  $\mu$ g/ml cadmium chloride.

414 Cells were grown to a log phase ( $2.5$  to  $3.5 \times 10^5$  cells/ml) and expression was induced  
415 by adding cadmium chloride at concentration of 1 $\mu$ g/ml for 4 hours. Cells were harvested at  
416 1100 g, fixed with 4% paraformaldehyde for 20 minutes at RT, washed and resuspended in  
417 10mM HEPES, pH 7.5 before imaging.

418

#### 419 **Cloning, expression and purification of recombinant proteins in *E.coli***

420 For expression in *E. coli*, the amplified PCR products of Drp6, Drp6-I553M and Drp6-DTD  
421 were cloned into pRSETB using BamHI and EcoRI sites. The resulting constructs were  
422 transformed into chemically competent *E.coli* C41(DE3) cells and transformants were  
423 inoculated into LB broth supplemented with 100 $\mu$ g/ml ampicillin and grown at 37°C till the  
424 OD600 reached 0.4. The cultures were then shifted to 18°C and expression was induced after 1  
425 hour by adding 0.5mM IPTG (Sigma) and kept for 16 hours at the same temperature before  
426 harvesting the cells. The harvested cells were resuspended in ice cold Buffer A (25mM HEPES  
427 pH 7.5, 300mM NaCl, 2mM MgCl<sub>2</sub>, 2mM  $\beta$ -mercaptoethanol and 10% glycerol) supplemented  
428 with EDTA-free protease inhibitor cocktail (Roche) and 100mM phenyl methyl sulfonyl  
429 fluoride, lysed by sonication and the lysates were centrifuged at 52000 g for 45 min at 4°C. The  
430 supernatants were incubated with Ni-NTA agarose resin (Qiagen, Germany) for 2 hours before  
431 washing with 100 bed volume buffer A supplemented with 50mM imidazole. The bound  
432 proteins were eluted with 250mM imidazole in buffer A. The purified proteins were checked  
433 by Coomassie-stained SDS- PAGE gels and the purity was assessed by Image J analysis (NIH).  
434 The fractions containing the purified proteins were pooled, dialyzed with buffer A and

435 concentrated using Amicon ultra-15 filters (Millipore). Protein concentration was estimated by  
436 Bradford assay (Bio-Rad Laboratories, USA).

437

#### 438 **Western blotting:**

439 Samples were subjected to SDS-PAGE gel and the proteins were transferred to PVDF  
440 membrane. Membrane was blocked with 2% BSA in TBST (50 mM Tris-Cl, 150 mM NaCl, pH  
441 8.0 and 0.05% Tween 20) for 1 hour. The blot was then incubated with HRP-conjugated anti-  
442 His monoclonal antibody (1:5000) and detected with supersignal femto substrate  
443 (ThermoScientific, USA) using ChemiDoc imaging system (Bio-Rad laboratories, USA).

444

#### 445 **Fractionation of membrane protein and soluble protein:**

446 *Tetrahymena* cells expressing GFP-Drp6 or GFP-DTD were lysed in 500 µl of ice cold lysis  
447 buffer containing 25mM Tris-Cl pH 7.5, 300mM NaCl, 10% glycerol supplemented with E-64,  
448 pepstatin, aprotinin, PMSF and protease inhibitor cocktail (Roche) by passing through a ball  
449 bearing homogeniser with a nominal clearance of 0.0007 in. The resulting lysates were  
450 centrifuged at 16000 g for 15 min at 4°C, the supernatant was collected as soluble protein  
451 fraction, and the pellet containing the membrane fraction was resuspended in 500 µl lysis  
452 buffer. The proteins in both soluble fraction and membrane fraction were separated in 12%  
453 SDS-PAGE gel and analysed by western blotting using anti-GFP polyclonal antibody (1:4000;  
454 Sigma-Aldrich).

455

#### 456 **Lipid overlay assay:**

457 Total *Tetrahymena* lipid was extracted from growing *Tetrahymena* cells ( $5 \times 10^5$  cells/ml) by  
458 method Bligh and Dyer (1959). Drops of 5 µl in chloroform were spotted on the nitrocellulose  
459 membrane and incubated with His-Drp6 (90 µg/ml) in GTPase assay buffer in presence or  
460 absence of 1 mM GTP for 1 hour. In control experiments, BSA (2) was used in place of His-  
461 Drp6. The assay using membrane lipid strips (P-6002, Echelon Biosciences, USA) spotted with  
462 100 pmol of 15 different lipids were used according to the manufacturer's instruction. The  
463 binding of proteins was detected by western blot analysis using anti-His monoclonal antibody.

464

#### 465 **Floation assay:**

466 Lipids (Avanti Polar) were dissolved in analytical grade chloroform, liposomes were prepared  
467 using 2.5 mg total lipid in 1ml chloroform. The liposomes contained 70% PC and 20% PE along

468 with either 10% CL or 10% PA or 10% PS. A thin dry film was obtained by drying the solution  
469 in a round bottom flask and solvent was completely removed in a lyophilizer. Liposomes were  
470 made by rehydrating the film in buffer A (25mM HEPES pH 7.5, 2mM MgCl<sub>2</sub>, 150mM NaCl)  
471 pre-warmed at 37°C. The resuspended solution was extruded 17-21 times through extruder  
472 (Avanti Polar) using filter with 100nm pore and the size distribution was measured by DLS in  
473 Malvern Zetasizer Nano. For floatation assay, 1µM protein was incubated with 0.5mg  
474 liposomes in buffer A supplemented with 1mM GTP for 1 hour at RT. Sucrose was added to  
475 the reaction mixture (final sucrose concentration 40%), placed at the bottom of a 13 ml ultra-  
476 centrifugation tube and overlaid with 2 ml each of 35%, 30%, 25%, 20%, 15% and 0% sucrose  
477 solutions in the same buffer. The gradient was subjected to ultra-centrifugation in Beckman  
478 Coulter ultra-centrifuge at 35,000 RPM for 15 hours at 4°C using SW41 rotor. Fractions  
479 (500µl) were collected from top and detected by western blotting using anti-His HRP  
480 conjugated monoclonal antibody (1:5000).

481

#### 482 **Measurement of GTP hydrolysis activity:**

483 The GTP hydrolysis activity of recombinant Drp6 and Drp6 I553M was measured in a  
484 colorimetric assay using Malachite Green-based phosphate assay reagent (BIOMOL Green,  
485 Enzo Life Sciences). The GTPase assay (20 ul in 25mM HEPES pH7.5, 15mM KCl, 2mM  
486 MgCl<sub>2</sub>) was performed in presence of 1mM GTP (Sigma) using 1µM protein for 0-30 min at  
487 37°C. The reaction was stopped by adding 5µl of 0.5 mM EDTA and absorbance was measured  
488 at 620 nm. For measuring K<sub>m</sub> and K<sub>cat</sub>, reactions were performed for 10 min at 37°C in  
489 triplicate using varying concentrations of GTP (50 µM to 2000 µM). The values obtained from  
490 three independent experiments were plotted and analyzed using GraphPad Prism7 software.

491

#### 492 **Size exclusion chromatography:**

493 Size exclusion chromatography was performed on the Superdex 200 GL 10/300 column (GE  
494 Life Sciences) using Akta Explorer FPLC system (GE healthcare) which was calibrated with  
495 standard molecular weight markers (Sigma). Five hundred microliters of protein (0.5mg/ml) in  
496 buffer A was loaded onto the pre-equilibrated column and was run at 0.5ml/min. The  
497 chromatogram was recorded by taking absorbance at 280 nm.

498

#### 499 **Electron microscopy:**

500 Purified recombinant Drp6 or Drp6 I553M (1µM) was incubated with 0.5mM GTPγS in 25 mM  
501 HEPES pH 7.5, 150 mM NaCl and 2 mM MgCl<sub>2</sub> for 20 min at room temperature and was

502 adsorbed for 5 min onto a 200 mesh carbon coated Copper grid (Ted Pella, Inc.). The grid was  
503 stained with a drop of 2% freshly prepared uranyl acetate (MP Biomedicals, USA) for 2 min  
504 and dried at room temperature for 10 min. The electron micrographs were collected on a FEI  
505 Tecnai G2 120KV electron microscope.

506

#### 507 **Confocal microscopy:**

508 *Tetrahymena* cells were fixed with 4% paraformaldehyde (PFA) in 50mM HEPES pH 7.5 for  
509 20 min at RT and were collected in 10 mM HEPES pH 7.5 after centrifugation at 1100 X g.  
510 The fixed cells were stained with DAPI (0.25 ug/ml) (Invitrogen) and washed with 10 mM  
511 HEPES pH 7.5 before imaging. The images were collected in a Zeiss LSM780 or Leica DMI8  
512 confocal microscope.

513

#### 514 **Pentachlorophenol (PCP) and Nonyl acridine orange (NAO) treatment:**

515 The growing *Tetrahymena* cells either expressing *GFP-Drp6* or *GFP-Nup3* or *GFP-Nem1D*  
516 were treated with 10  $\mu$ M PCP in DMSO for 30 minutes before fixing with 4%  
517 paraformaldehyde. The conjugation pairs were either treated with 30  $\mu$ M PCP or 0.5  $\mu$ M NAO  
518 (Invitrogen) after 2.5 h, 4.5 h or 7.5 h post-mixing, and were fixed after 30 minutes of addition.  
519 The cells were stained with DAPI (0.25 ug/ml) before imaging.

520

#### 521 Author Contributions:

522 A.R. designed the experiments. U.P.K. and H.D performed all experiments. U.P.K., H.D.  
523 and A.R. analyzed the results. U.P.K., H.D. and A.R. wrote the manuscript.

524

#### 525 Acknowledgements:

526 We thank Prof. Aaron Turkewitz from the University of Chicago, Dr Kausik  
527 Chakraborty from IGIB, Prof. Jacek Gaertig from University of Georgia and Dr Utpal  
528 Nath from Indian Institute of Science for critical evaluation and useful comments on the  
529 manuscript. The work was partly funded by DBT grant  
530 (BT/PR14643/BRB/10/862/2010) to AR. The funders have no role in study design and  
531 interpretation, or the decision to submit the work for publication.

532

533

534

535

536

537

538



539 **REFERENCES:**

- 540 Achiriloaie, M., B. Barylko and J. P. Albanesi (1999). "Essential role of the dynamin  
541 pleckstrin homology domain in receptor-mediated endocytosis." Mol Cell Biol **19**(2):  
542 1410-1415.
- 543 Bramkamp, M. (2012). "Structure and function of bacterial dynamin-like proteins." Biol  
544 Chem **393**(11): 1203-1214.
- 545 Bustillo-Zabalbeitia, I., S. Montessuit, E. Raemy, G. Basanez, O. Terrones and J. C.  
546 Martinou (2014). "Specific interaction with cardiolipin triggers functional activation of  
547 Dynamin-Related Protein 1." PLoS One **9**(7): e102738.
- 548 Cole, E. S., D. Cassidy-Hanley, J. Hemish, J. Tuan and P. J. Bruns (1997). "A mutational  
549 analysis of conjugation in *Tetrahymena thermophila*. 1. Phenotypes affecting early  
550 development: meiosis to nuclear selection." Dev Biol **189**(2): 215-232.
- 551 Elde, N. C., G. Morgan, M. Winey, L. Sperling and A. P. Turkewitz (2005). "Elucidation  
552 of clathrin-mediated endocytosis in *Tetrahymena* reveals an evolutionarily convergent  
553 recruitment of dynamin." PLoS Genet **1**(5): e52.
- 554 Francy, C. A., R. W. Clinton, C. Frohlich, C. Murphy and J. A. Mears (2017). "Cryo-EM  
555 Studies of Drp1 Reveal Cardiolipin Interactions that Activate the Helical Oligomer." Sci  
556 Rep **7**(1): 10744.
- 557 Jarasch, E. D., C. E. Reilly, P. Comes, J. Kartenbeck and W. W. Franke (1973). "Isolation  
558 and characterization of nuclear membranes from calf and rat thymus." Hoppe Seylers Z  
559 Physiol Chem **354**(8): 974-986.
- 560 Kameoka, S., Y. Adachi, K. Okamoto, M. Iijima and H. Sesaki (2018). "Phosphatidic Acid  
561 and Cardiolipin Coordinate Mitochondrial Dynamics." Trends Cell Biol **28**(1): 67-76.
- 562 Kar, U. P., H. Dey and A. Rahaman (2018). "Tetrahymena dynamin-related protein 6 self-  
563 assembles independent of membrane association." J Biosci **43**(1): 139-148.
- 564 Karrer, K. M. (2000). "Tetrahymena genetics: two nuclei are better than one." Methods  
565 Cell Biol **62**: 127-186.
- 566 Kay, J. G., M. Koivusalo, X. Ma, T. Wohland and S. Grinstein (2012). "Phosphatidylserine  
567 dynamics in cellular membranes." Mol Biol Cell **23**(11): 2198-2212.
- 568 Keenan, T. W., R. Berezney, L. K. Funk and F. L. Crane (1970). "Lipid composition of  
569 nuclear membranes isolated from bovine liver." Biochim Biophys Acta **203**(3): 547-554.
- 570 Kleinig, H., H. Zentgraf, P. Comes and J. Stadler (1971). "Nuclear membranes and plasma  
571 membranes from hen erythrocytes. II. Lipid composition." J Biol Chem **246**(9): 2996-3000.
- 572 Maftah, A., J. M. Petit and R. Julien (1990). "Specific interaction of the new fluorescent  
573 dye 10-N-nonyl acridine orange with inner mitochondrial membrane. A lipid-mediated  
574 inhibition of oxidative phosphorylation." FEBS Lett **260**(2): 236-240.
- 575 Nozawa, Y., H. Fukushima and H. Iida (1973). "Isolation and lipid composition of nuclear  
576 membranes from macronuclei of *Tetrahymena pyriformis*." BBA **318**(3): 335-344.
- 577 Ono, Y. and D. C. White (1971). "Consequences of the inhibition of cardiolipin metabolism  
578 in *Haemophilus parainfluenzae*." J Bacteriol **108**(3): 1065-1071.
- 579 Pillai, A. N., S. Shukla, S. Gautam and A. Rahaman (2017). "Small phosphatidate  
580 phosphatase (TtPAH2) of *Tetrahymena* complements respiratory function and not  
581 membrane biogenesis function of yeast PAH1." J Biosci **42**(4): 613-621.

- 582 Planas-Iglesias, J., H. Dwarakanath, D. Mohammadyani, N. Yanamala, V. E. Kagan and J.  
583 Klein-Seetharaman (2015). "Cardiolipin Interactions with Proteins." *Biophys J* **109**(6):  
584 1282-1294.
- 585 Praefcke, G. J. K. and H. T. McMahon (2004). "The dynamin superfamily: universal  
586 membrane tubulation and fission molecules?" *Nature reviews. Molecular cell biology* **5**:  
587 133-147.
- 588 Rahaman, A., N. C. Elde and A. P. Turkewitz (2008). "A Dynamin-Related Protein  
589 Required for Nuclear Remodeling in Tetrahymena." *Current Biology* **18**: 1227-1233.
- 590 Ramachandran, R., T. J. Pucadyil, Y. W. Liu, S. Acharya, M. Leonard, V. Lukiyanchuk  
591 and S. L. Schmid (2009). "Membrane insertion of the pleckstrin homology domain variable  
592 loop 1 is critical for dynamin-catalyzed vesicle scission." *Mol Biol Cell* **20**(22): 4630-4639.
- 593 Ramachandran, R. and S. L. Schmid (2018). "The dynamin superfamily." *Curr Biol* **28**(8):  
594 R411-R416.
- 595 Ramachandran, R., M. Surka, J. S. Chappie, D. M. Fowler, T. R. Foss, B. D. Song and S.  
596 L. Schmid (2007). "The dynamin middle domain is critical for tetramerization and higher-  
597 order self-assembly." *EMBO J* **26**(2): 559-566.
- 598 Rujiviphat, J., G. Meglei, J. L. Rubinstein and G. A. McQuibban (2009). "Phospholipid  
599 association is essential for dynamin-related protein Mgm1 to function in mitochondrial  
600 membrane fusion." *J Biol Chem* **284**(42): 28682-28686.
- 601 Salim, K., M. J. Bottomley, E. Querfurth, M. J. Zvelebil, I. Gout, R. Scaife, R. L. Margolis,  
602 R. Gigg, C. I. Smith, P. C. Driscoll, M. D. Waterfield and G. Panayotou (1996). "Distinct  
603 specificity in the recognition of phosphoinositides by the pleckstrin homology domains of  
604 dynamin and Bruton's tyrosine kinase." *EMBO J* **15**(22): 6241-6250.
- 605 Sato, T., T. Fuji, T. Matsuura and K. Ueda (1972). "Lipid composition of nuclear  
606 membranes isolated from calf thymus." *J Biochem* **72**(4): 1049-1051.
- 607 Shukla, S., A. N. Pillai and A. Rahaman (2018). "A putative NEM1 homologue regulates  
608 lipid droplet biogenesis via PAH1 in Tetrahymena thermophila." *J Biosci* **43**(4): 693-706.
- 609 Smaczynska-de, R., II, C. J. Marklew, S. E. Palmer, E. G. Allwood and K. R. Ayscough  
610 (2019). "Mutation of key lysine residues in the Insert B region of the yeast dynamin Vps1  
611 disrupts lipid binding and causes defects in endocytosis." *PLoS One* **14**(4): e0215102.
- 612 Smaczynska-de Rooij, I. I., C. J. Marklew, E. G. Allwood, S. E. Palmer, W. I. Booth, R.  
613 Mishra, M. W. Goldberg and K. R. Ayscough (2015). "Phosphorylation Regulates the  
614 Endocytic Function of the Yeast Dynamin-Related Protein Vps1." *Molecular and cellular  
615 biology* **36**: 742-755.
- 616 Unsay, J. D., K. Cosentino, Y. Subburaj and A. J. Garcia-Saez (2013). "Cardiolipin effects  
617 on membrane structure and dynamics." *Langmuir* **29**(51): 15878-15887.
- 618 Vallis, Y., P. Wigge, B. Marks, P. R. Evans and H. T. McMahon (1999). "Importance of  
619 the pleckstrin homology domain of dynamin in clathrin-mediated endocytosis." *Curr Biol*  
620 **9**(5): 257-260.
- 621 von der Malsburg, A., I. Abutbul-Ionita, O. Haller, G. Kochs and D. Danino (2011). "Stalk  
622 domain of the dynamin-like MxA GTPase protein mediates membrane binding and  
623 liposome tubulation via the unstructured L4 loop." *J Biol Chem* **286**(43): 37858-37865.

624 Wang, M., X. Guo, X. Yang, B. Zhang, J. Ren, A. Liu, Y. Ran, B. Yan, F. Chen, L. W.  
625 Guddat, J. Hu, J. Li and Z. Rao (2019). "Mycobacterial dynamin-like protein IniA mediates  
626 membrane fission." Nat Commun **10**(1): 3906.

627 Yan, L., Y. Qi, D. Ricketson, L. Li, K. Subramanian, J. Zhao, C. Yu, L. Wu, R. Sarsam,  
628 M. Wong, Z. Lou, Z. Rao, J. Nunnari and J. Hu (2020). "Structural analysis of a trimeric  
629 assembly of the mitochondrial dynamin-like GTPase Mgm1." Proc Natl Acad Sci U S A  
630 **117**(8): 4061-4070.

631 Zegarłinska, J., M. Piasek, A. F. Sikorski and A. Czogalla (2018). "Phosphatidic acid - a  
632 simple phospholipid with multiple faces." Acta Biochim Pol **65**(2): 163-171.

633 Zheng, J., S.M. Cahill, M.A. Lemmon, D. Fushman, J. Schlessinger and D. Cowburn  
634 (1996) "Identification of the binding site for acidic phospholipids on the PH domain of  
635 dynamin; Implications for stimulation of GTPase activity." J Mol Biol **255**(1): 14-21.

636

637 **Footnotes:** Abbreviations used are: DRP, dynamin related proteins; MIC, micronucleus; MAC,  
638 macronucleus; DTD, Drp targeting determinant; PA, phosphatidic acid; PS, phosphatidylserine;  
639 CL, cardiolipin; ER, endoplasmic reticulum.

640

641

642

643

644

645

646

647

648

649

650

651

652

653

654

655

656

657

658

659

660

661

662

663

664

665

666

667 **Figure 1**

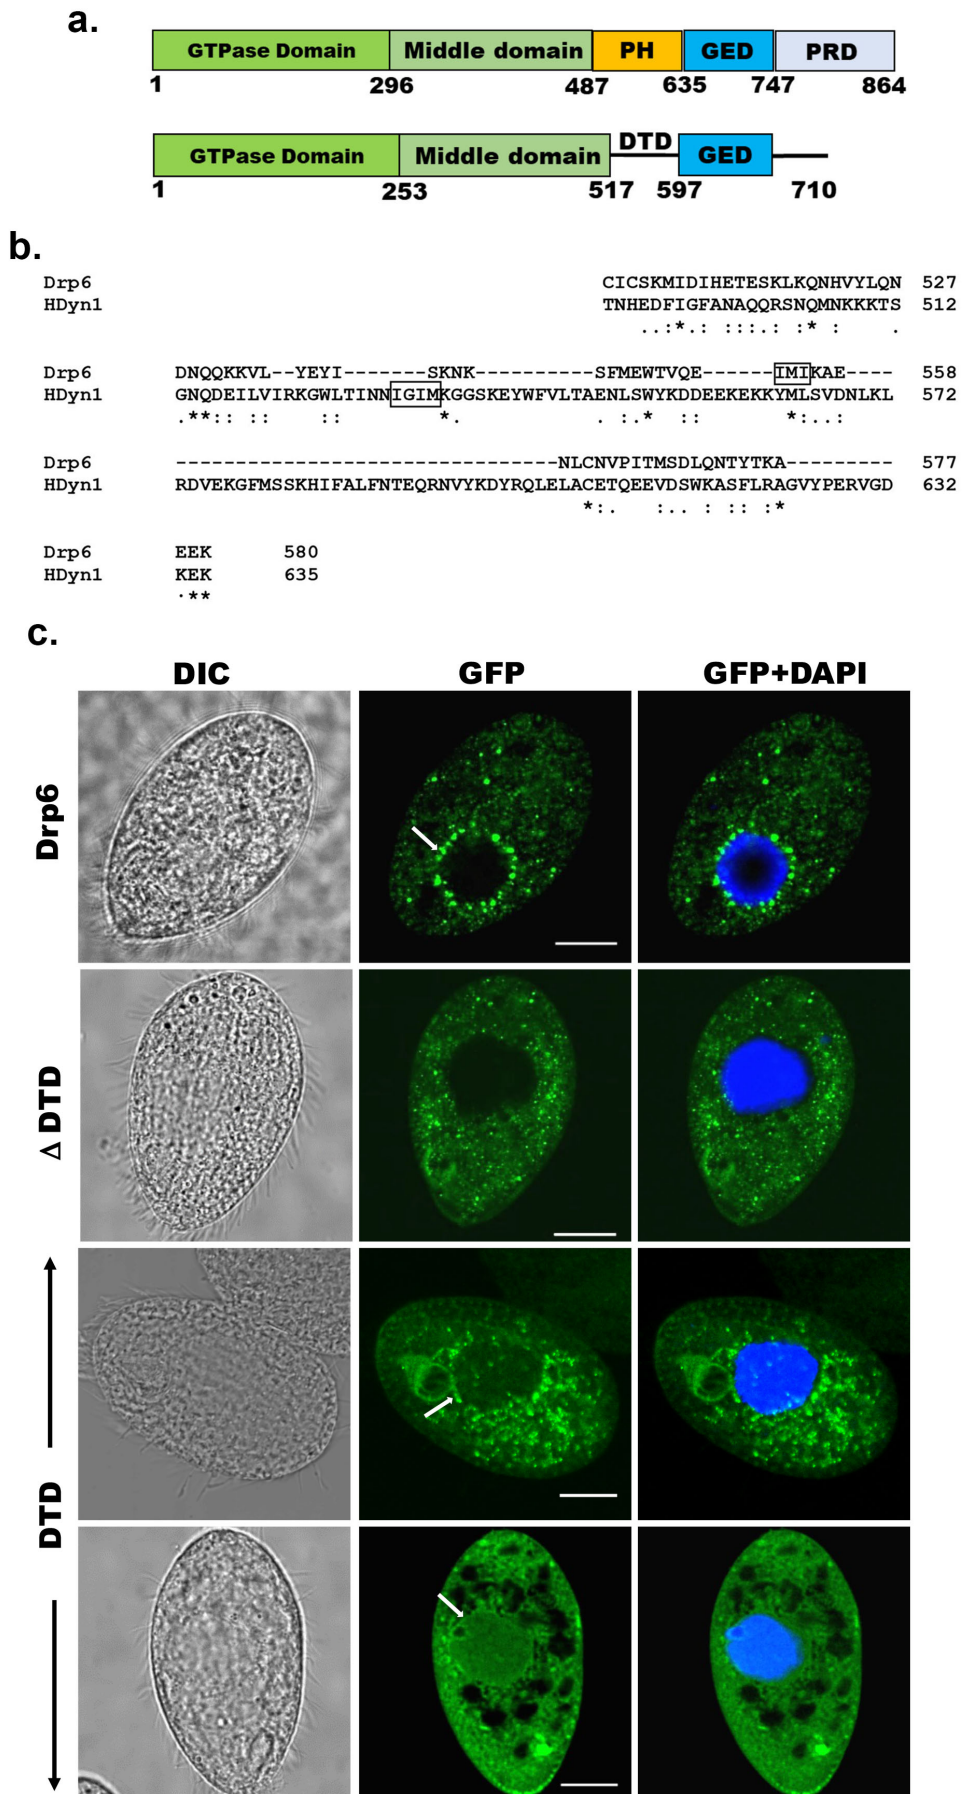

669  
670  
671  
672  
673  
674  
675  
676  
677  
678  
679  
680  
681  
682  
683  
684  
685  
686  
687  
688  
689  
690  
691  
692  
693  
694  
695  
696  
697  
698  
699  
700  
701  
702  
703  
704  
705  
706  
707  
708  
709  
710  
711  
712

**Fig. 1. Identification of the region of Drp6 important for nuclear recruitment**

- a. Diagram showing domains of human dynamin 1 (Top) and Drp6 (Bottom). Five domains of dynamin indicated as G domain, Middle domain, PH domain, GED and PRD. Drp6 contains 3 domains but lack PH domain and PRD. Numbers indicate the position of amino acids in the protein.
- b. Sequence alignment of *Tetrahymena* Dynamin Related Protein 6 (Drp6) and human dynamin1 (HDyn1) generated using Clustal Omega. Only the PH domain of HDyn1 and the corresponding aligned region of Drp6 are shown. The hydrophobic patch (IGIM) of PH domain important for membrane insertion is shown within a box. A putative hydrophobic patch (IMI) in Drp6 is also within box.
- c. Confocal images of fixed *Tetrahymena* cells after DAPI staining. Cells expressing GFP-Drp6 (Drp6), GFP- Drp6 $\Delta$ DTD ( $\Delta$ DTD), and Drp6- DTD (DTD) are shown. DAPI in blue marks the nucleus. Localization on the nuclear envelope is indicated by arrow. Bar = 10 $\mu$ m.

713 **Figure 2**

714

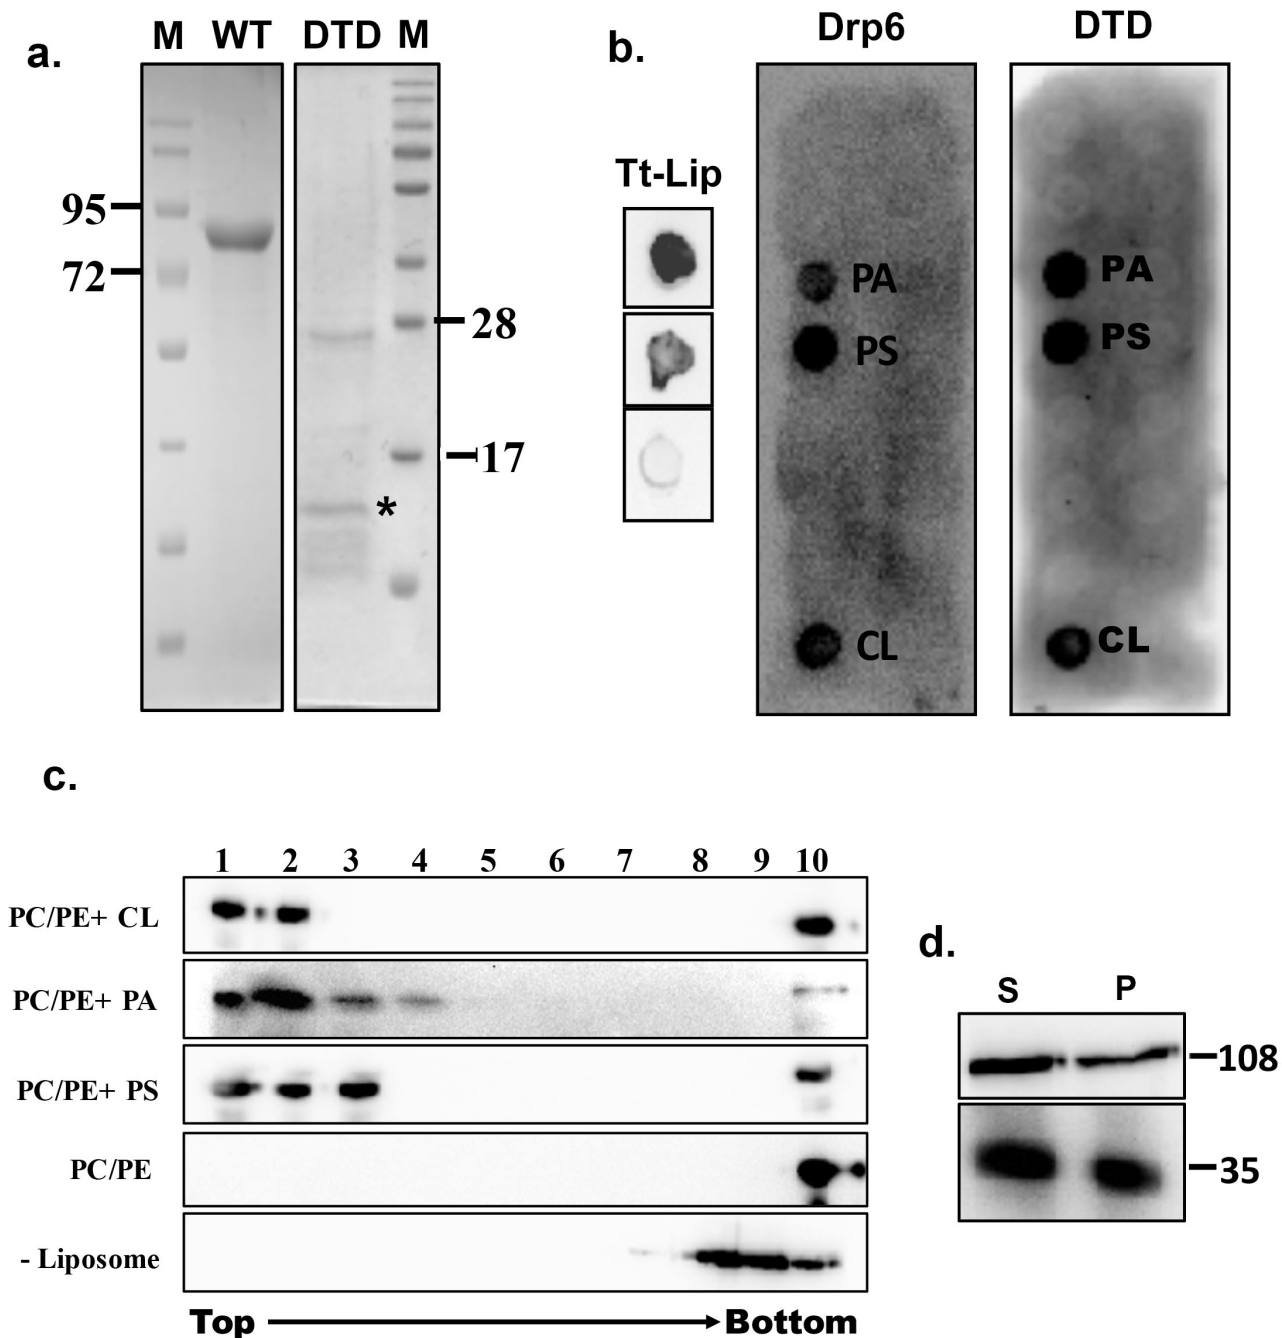

715

716

717

718 **Fig. 2. Identification of membrane-binding domain of Drp6**

719 *a.* Coomassie stained SDS-PAGE gels showing purification of His- Drp6 (WT) and, His- DTD  
 720 (DTD) expressed in *E. coli*. M is the molecular weight markers. Some of the markers are  
 721 indicated on the sides. The purification of His-Drp6 DTD was partial and contained  
 722 additional proteins from *E.coli* including one prominent band below 28kDa. The purified  
 723 His-Drp6 DTD appearing below 17 kDa marker is indicated by an asterisk.

- 724 b. Lipid overlay assay as detected by western blot analysis using anti-his antibody. (Tt-Lip);  
725 total *Tetrahymena* lipid spotted on nitrocellulose membrane and incubated with His-Drp6 in  
726 absence (top) or presence (middle) of GTP. The bottom spot is incubated with buffer without  
727 protein. Strip spotted with 15 different lipids and incubated either with His-Drp6 (Drp6) or  
728 with His-DTD (DTD). Both Drp6 and DTD interacted with Phosphatidic acid (PA),  
729 Phosphatidylserine (PS) and cardiolipin (CL) and are indicated.
- 730 c. Flootation assay using liposomes containing 70% Phosphatidylcholine and 20%  
731 phosphatidylethanolamine additionally supplemented with 10% Cardiolipin (PC/PE+CL),  
732 10% Phosphatidic acid (PC/PE+PA), 10% Phosphatidylserine (PC/PE+PS). While  
733 Liposomes in (PC/PE) contained 80% Phosphatidylcholine and 20%  
734 phosphatidylethanolamine, no liposome was added in (-Liposome). His-Drp6 was incubated  
735 either with different liposomes or without liposomes, overlaid with sucrose gradient and  
736 subjected to ultra-centrifugation. Fractions were collected from top and detected by western  
737 blot analysis using anti-his antibody. Drp6 appearing in the top four fractions indicate  
738 interaction with liposome. The experiments were repeated at least three times and  
739 representative results are shown here.
- 740 d. Lysates of *Tetrahymena* cells expressing either GFP-Drp6 (Top panel) or GFP-Drp6 DTD  
741 (bottom panel) were fractionated into soluble (S) and membrane (P) fractions, and detected  
742 by western blot using anti-GFP antibody. Molecular weights of the proteins are indicated on  
743 the right.

744  
745  
746  
747  
748  
749  
750  
751  
752  
753  
754  
755  
756  
757  
758  
759  
760  
761  
762  
763

764 **Figure 3**

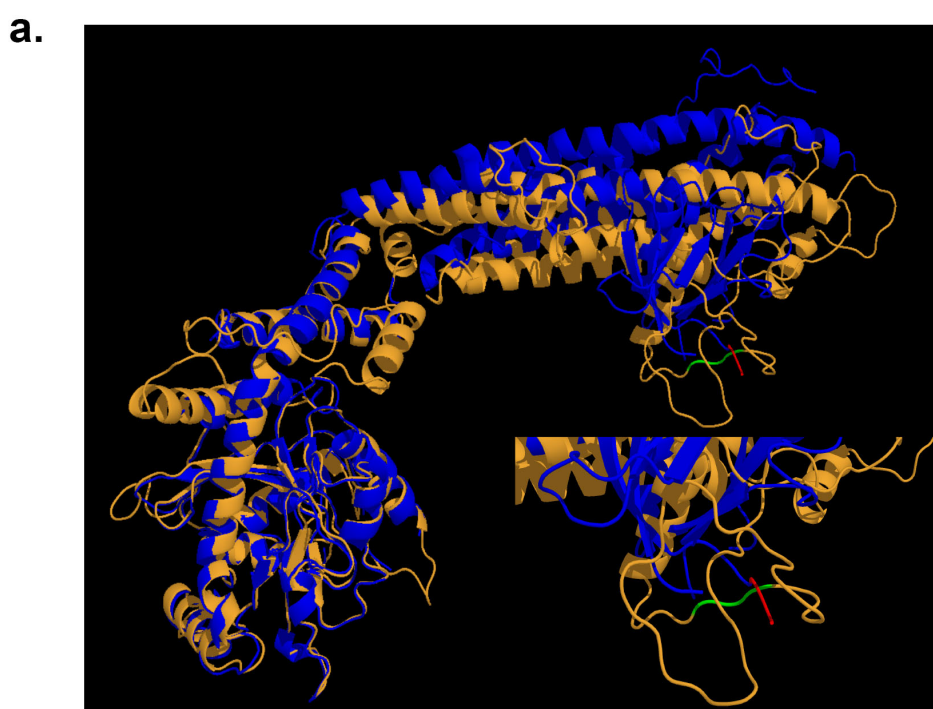

**b.**

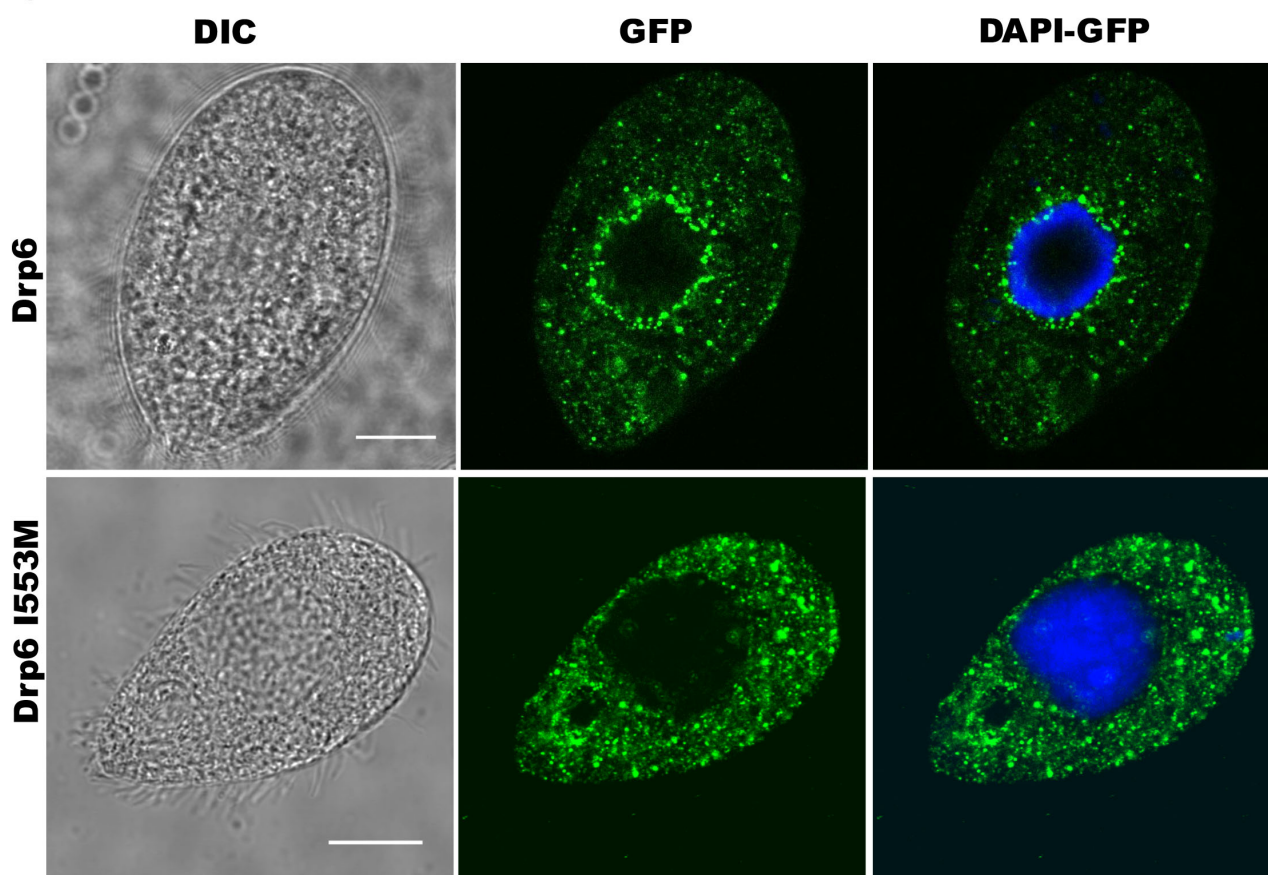

765  
766



767 **Fig. 3. An isoleucine in the membrane binding domain is important for nuclear**  
768 **localization of Drp6.**

769 a. Three dimensional structure of Drp6. Homology model of Drp6 (brown) was generated by  
770 I-TASSER using Human Dynamin-1 as template (blue). The part containing the  
771 hydrophobic patch (red) in the PH domain of Human Dynamin-1 important for membrane  
772 insertion along with the putative hydrophobic patch (green) of Drp6 model are shown at the  
773 bottom right after enlarging the area. Although far apart in primary sequences, the regions  
774 containing hydrophobic patch in both the proteins come to the vicinity in 3- D structure.

775 b. Localization of GFP-Drp6 (top) and GFP-Drp6 I553M (bottom). Confocal images of fixed  
776 *Tetrahymena* cells were obtained after DAPI staining. Mutation of isoleucine to methionine  
777 at 553<sup>rd</sup> position leads to loss of nuclear localization. DAPI in blue shows the nucleus.  
778 Bar=10µm

779  
780  
781  
782  
783  
784  
785  
786  
787  
788  
789  
790  
791  
792  
793  
794  
795  
796  
797  
798  
799  
800  
801  
802  
803  
804  
805  
806  
807  
808  
809  
810  
811

812 **Figure 4**

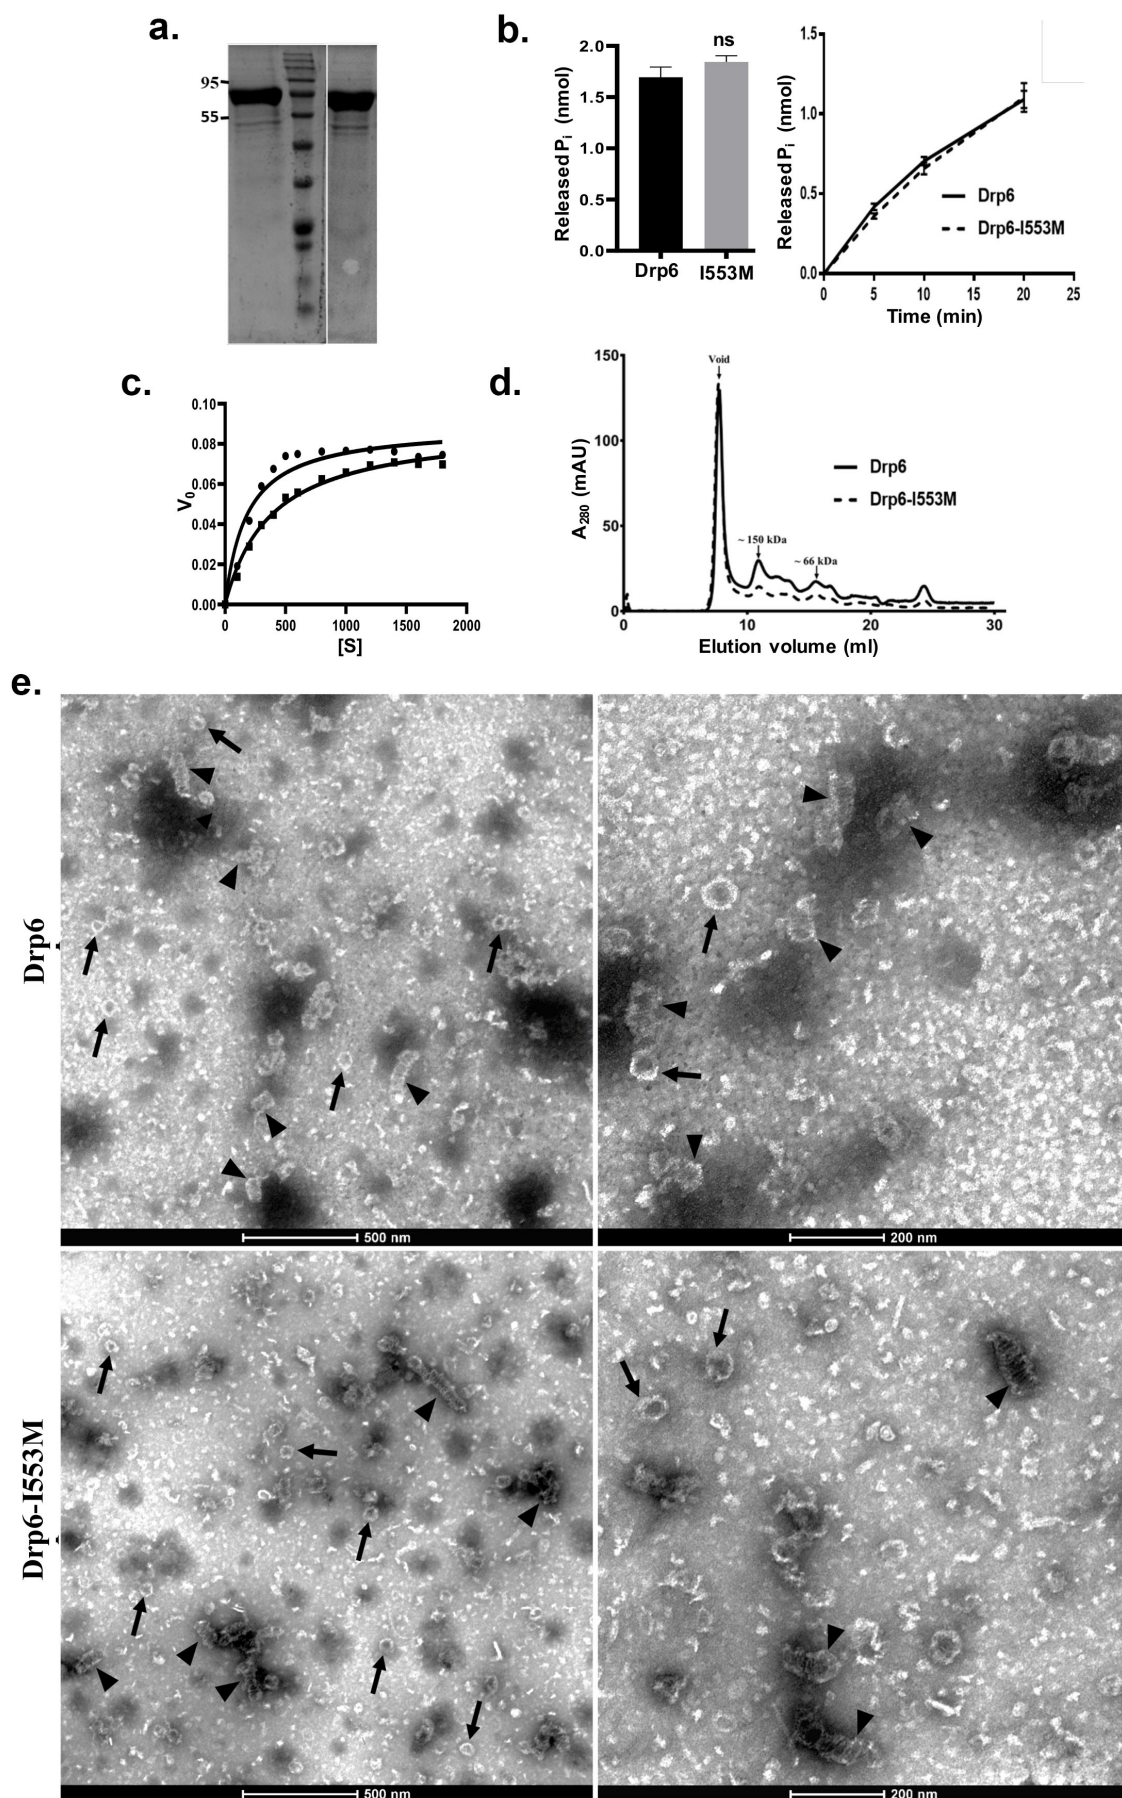

813

814  
815  
816  
817  
818  
819  
820  
821  
822  
823  
824  
825  
826  
827  
828  
829  
830  
831  
832  
  
833  
834  
835  
836  
837  
838  
839  
840  
841  
842  
843  
844  
845  
846  
847  
848  
849  
850

**Fig. 4. Mutation at I553 does not affect GTP hydrolysis activity and self-assembled structures.**

- a. Coomassie stained SDS-PAGE gel showing purified His-Drp6 (lane 1) and His-Drp6 I553M (lane 3). Lane 2 is molecular weight marker. The positions of molecular weight are indicated on the left
- b. Graph showing GTP hydrolysis of Drp6 and Drp6-I553M as measured by phosphate release after 30 min of reaction (left). The graph on right shows reactions carried out for 0 to 20 min.
- c. Michaelis-Menten plot showing GTP hydrolysis by Drp6 (circle) and Drp6-I553M (square).  $V_0$  = Rate of product formation in nmol  $P_i$ /μM protein/min and  $[S]$  = GTP concentration in μM.
- d. Chromatograms depicting elution profiles of His-Drp6 and His-Drp6-I553M using superdex 200 size-exclusion column. The void volume and the positions of molecular weight markers are indicated by arrows.
- e. Electron micrographs of negatively stained His-Drp6 (Drp6) and His-Drp6-I553M (Drp6-I553M) at two different magnifications. Helical spirals and the ring structures are found in both wildtype and mutant proteins, and are indicated by arrow head and arrow respectively.

851 **Figure 5**

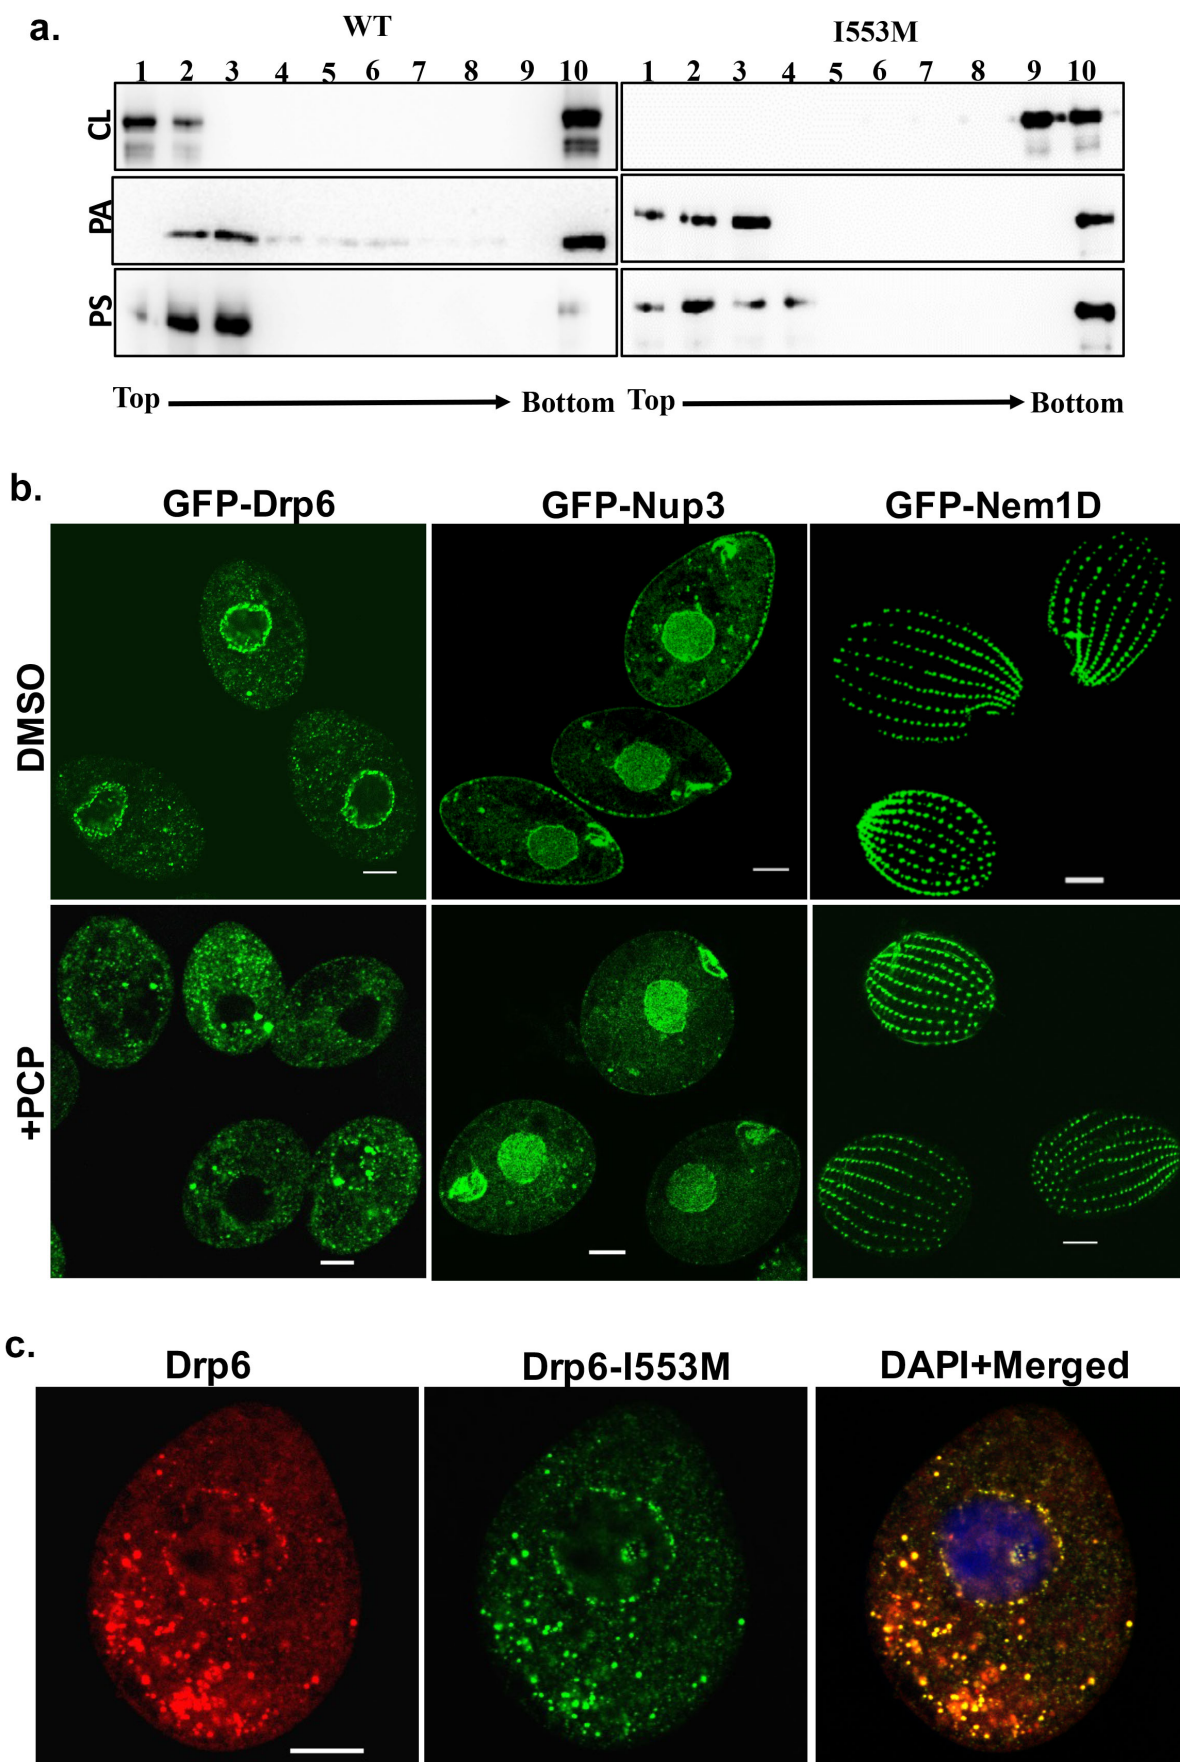

852

853  
854  
855  
856  
857  
858  
859  
860  
861  
862  
863  
864  
865  
866  
867  
868  
869  
870  
871  
872  
873  
874  
875  
876  
877  
878  
879  
880  
881  
882  
883  
884  
885  
886  
887  
888  
889  
890  
891  
892  
893  
894

**Fig. 5 Interaction of cardiolipin with membrane binding domain recruits Drp6 to the nuclear membrane.**

- a. Flootation assay was performed using liposomes with same composition and analysed by western blotting as mentioned in Fig. 2c. The assay was performed with wildtype Drp6 (WT) and Drp6-I553M (I553M). Liposomes supplemented with 10%Cardiolipin (CL), 10% Phosphatidic acid (PA), 10% Phosphatidylserine (PS) were used for the assay. Fractions collected from top to bottom are indicated. Experiments were repeated at least three times and representative results are shown here. Mutation at I553 lost interaction completely with the liposomes containing cardiolipin while retaining interactions with liposomes containing either phosphatidylserine or phosphatidic acid, suggesting isoleucine residue at 553<sup>rd</sup> position is important for binding with cardiolipin in the bilayers.
- b. Confocal images of fixed *Tetrahymena* cells expressing GFP -Drp6 (left panel), GFP-Nup3 (middle panel), and GFP-Nem1D (right panel) either in presence (+PCP) or absence (DMSO) of PCP. Bar= 10µm
- c. Confocal images of fixed *Tetrahymena* cells co-expressing mCherry-Drp6 (left panel), and GFP-Drp6 I553M (middle panel). Merged image with DAPI stained nucleus is shown in right panel. Yellow colour in the merged image signifies presence of both Drp6 and Drp6-I553M in the same complex. Bar=10µm

895

896 **Figure 6**

**a.**

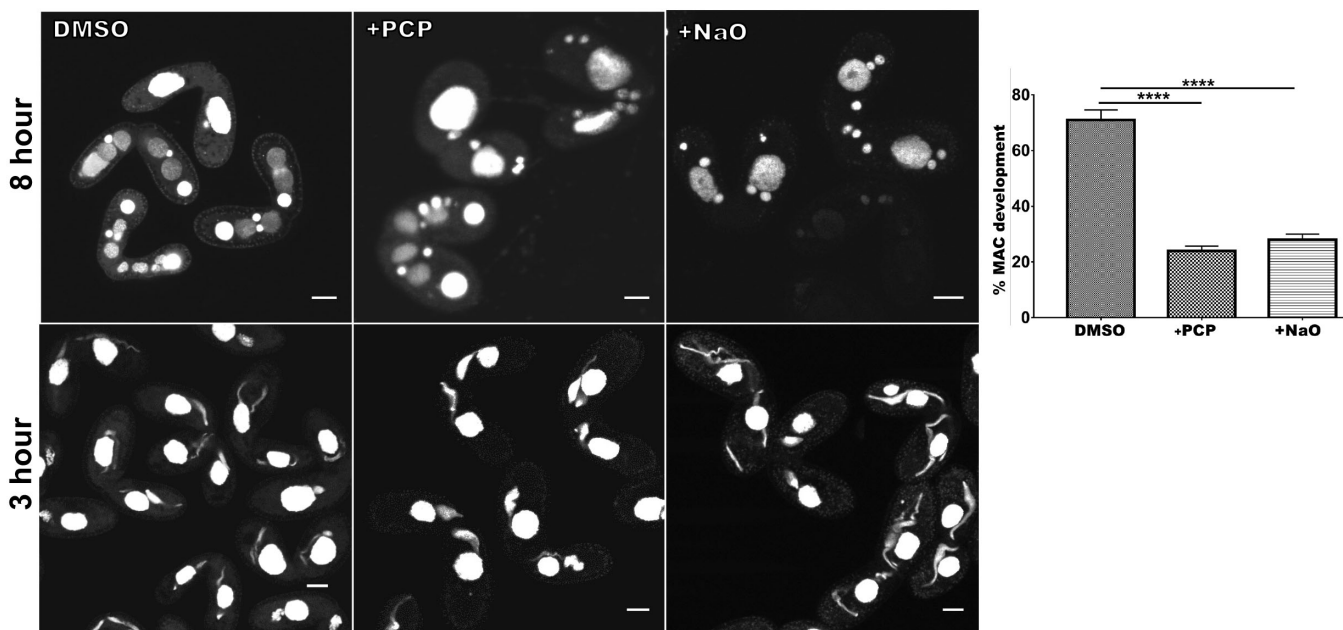

**b.**

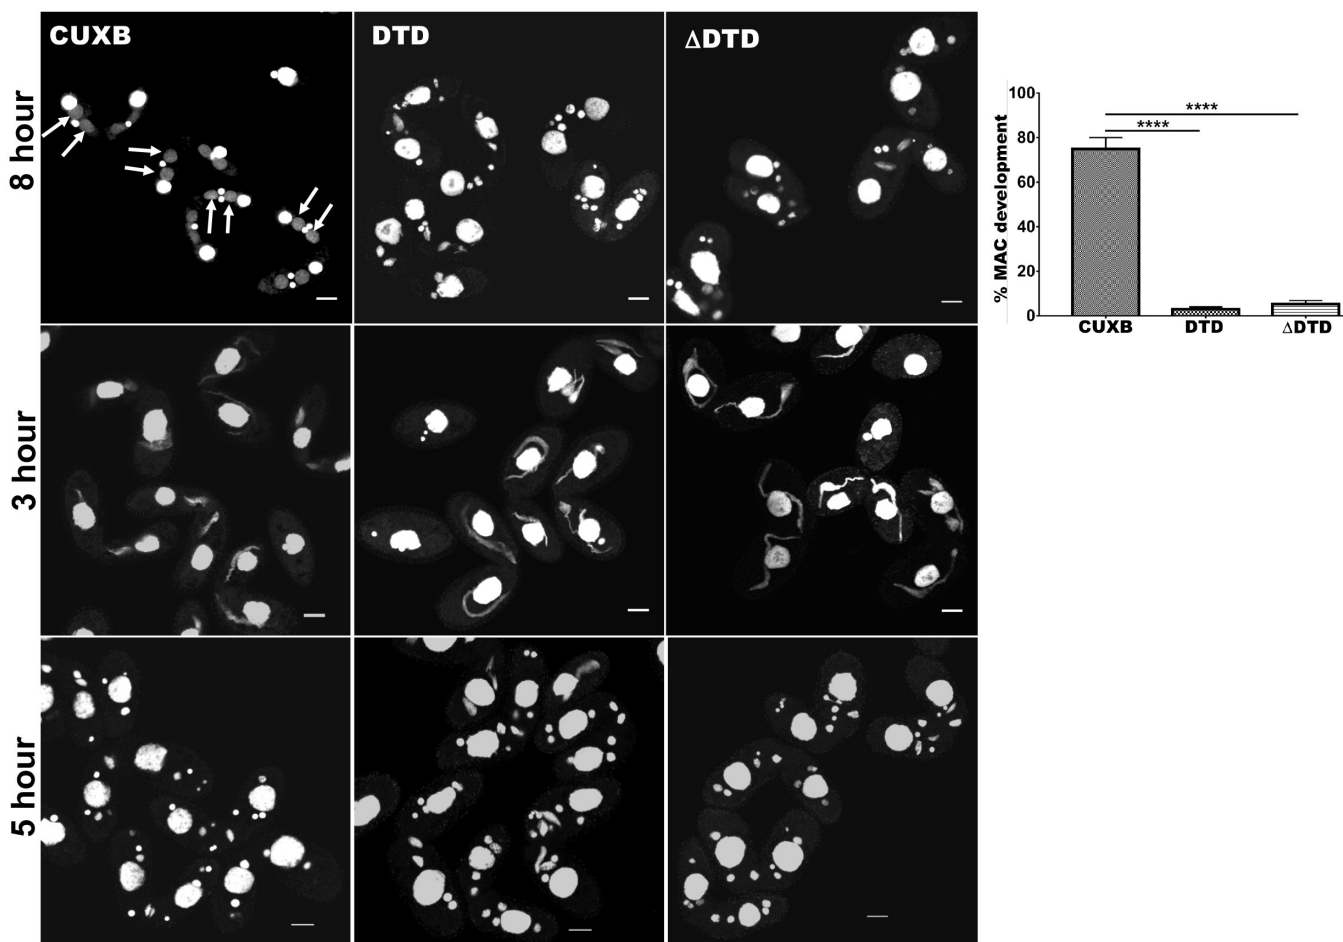

8

898

899

900 **Fig. 6 Cardiolipin and membrane binding domain regulate macronuclear expansion.**

901 a. Confocal images of fixed and DAPI stained conjugation pairs of *Tetrahymena* at 8 hours and  
902 3 hours post conjugation. Two wildtype strains of *Tetrahymena* (Cu428 and B2086) were  
903 conjugated and treated either with pentachlorophenol (+PCP) or with nonyl acridine orange  
904 -D (+NaO) or with DMSO (DMSO). Top panel shows MAC development at 8 h and bottom  
905 panel shows MIC elongation at 3 h. Percent MAC development at 8 h is shown at the right.

906 b. Confocal images of fixed DAPI stained *Tetrahymena* cells conjugated either between  
907 CU428 and B2086 (left panel) or between CU428 and GFP-Drp6 DTD (middle panel)  
908 expressing cells or between CU428 and GFP-Drp6  $\Delta$ DTD expressing cells (right panel). Top  
909 panel MAC development stage at 8 h, middle panel MIC elongation stage at 3 h and bottom  
910 panel meiotic stage at 5 h.

911 The newly developed MAC is indicated by arrow. For quantitation, three independent  
912 experiments were performed and analyzed by unpaired T test (\*\*\*\* indicates  $p \leq 0.0001$ ).

913
